# Supplementary material for: Flexible thermal conductive Al2O3@siloxane composite with rapid self-healing property based on carboxyl-amine dynamic reversible bonds
Source: Royal Society of Chemistry journal article supplement (doi:10.1039/d1ra09367c), 2022-01-01
Supplement: d1ra09367c2.pdf [file d1ra09367c2.pdf]

## Supplementary Material

### **Flexible Thermal Conductive Al<sub>2</sub>O<sub>3</sub>@siloxane Composite with Rapid Self-healing Property Based on Carboxyl-amine Dynamic Reversible bonds**

Ziyue Hu,<sup>a</sup> Weijian Wu,<sup>a</sup> Xiang Chen,<sup>\*a</sup> Yuanzhou Chen,<sup>a</sup> Junlin Chen,<sup>a</sup> Zhifeng Hao,<sup>\*a</sup>

<sup>a</sup> Guangdong Provincial Key Laboratory of Plant Resources Biorefinery, School of Chemical Engineering and Light Industry, Guangdong University of Technology, Guangzhou 510006, P. R. China.

**\* Corresponding author**

E -mail address: chenxiang@gdut.edu.cn (X. Chen); haozf@gdut.edu.cn (Z. Hao)

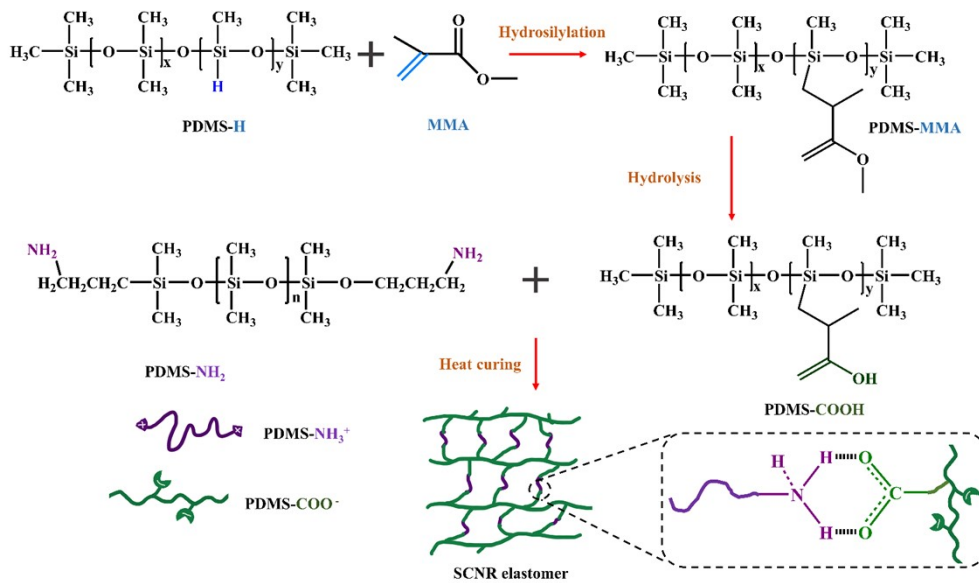

**Fig. S1: Preparation process of PDMS-COOH and SCNR**

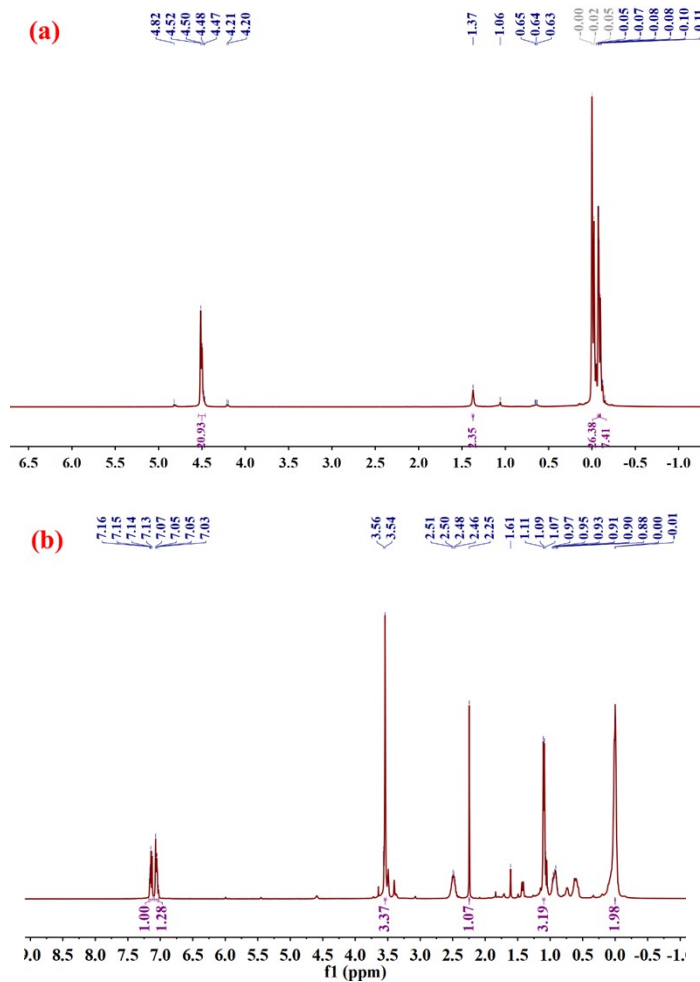

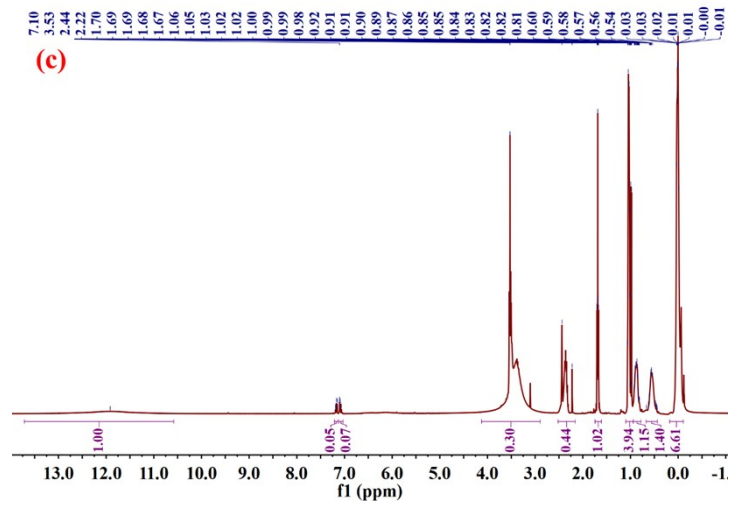

Fig. S2:(a)  $^1\text{H}$  NMR spectrogram of PDMS-H; (b) PDMS-MMA; (c) PDMS-COOH

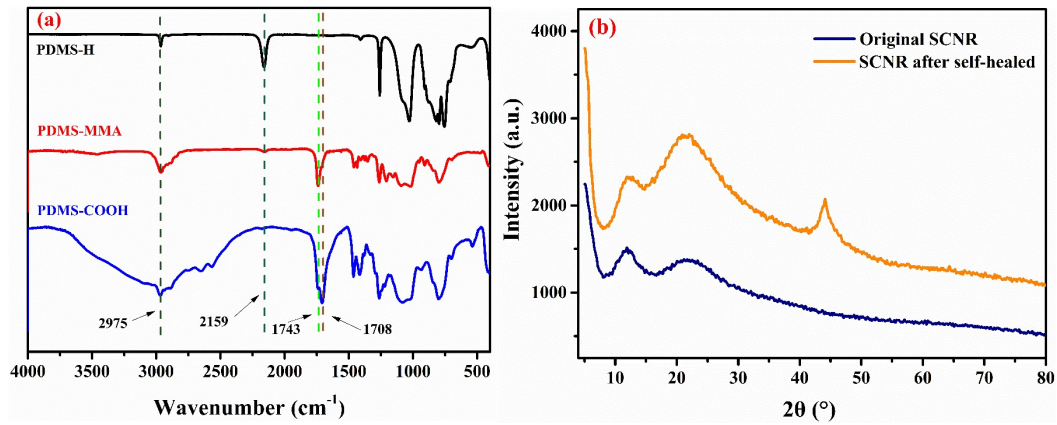

Fig. S3: (a) FTIR spectra of PDMS-H, PDMS-MMA, PDMS-COOH; (b) XRD patterns of the SCNR before and after self-healed

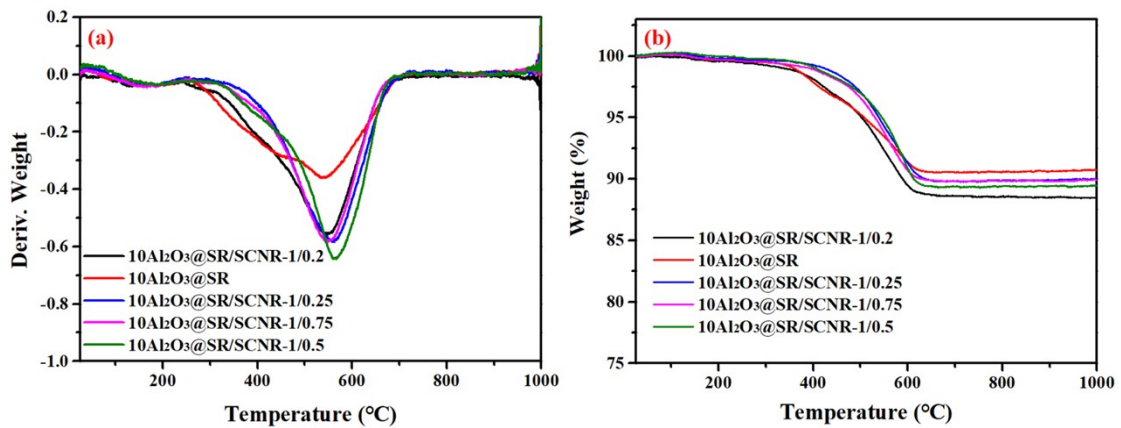

Fig. S4: (a) DTG curves of  $\text{Al}_2\text{O}_3@SR$  and  $\text{Al}_2\text{O}_3@SR/SCNR$  composites; (b) TG curves of  $\text{Al}_2\text{O}_3@SR$  and  $\text{Al}_2\text{O}_3@SR/SCNR$  composites;

**Table S1 Date of TG and DTG of  $\text{Al}_2\text{O}_3@\text{SR}$  and  $\text{Al}_2\text{O}_3@\text{SR}/\text{SCNR}$  composites**

| Sample                                                  | $T_d$ 5% ( $^{\circ}\text{C}$ ) | $T_d$ max ( $^{\circ}\text{C}$ ) | Mass % |
|---------------------------------------------------------|---------------------------------|----------------------------------|--------|
| $10\text{Al}_2\text{O}_3@\text{SR}$                     | 507                             | 539                              | 90.73  |
| $10\text{Al}_2\text{O}_3@\text{SR}/\text{SCNR}-1/0.025$ | 562                             | 569                              | 89.96  |
| $10\text{Al}_2\text{O}_3@\text{SR}/\text{SCNR}-1/0.05$  | 544                             | 566                              | 89.47  |
| $10\text{Al}_2\text{O}_3@\text{SR}/\text{SCNR}-1/0.075$ | 530                             | 548                              | 89.92  |
| $10\text{Al}_2\text{O}_3@\text{SR}/\text{SCNR}-1/0.02$  | 502                             | 548                              | 88.43  |

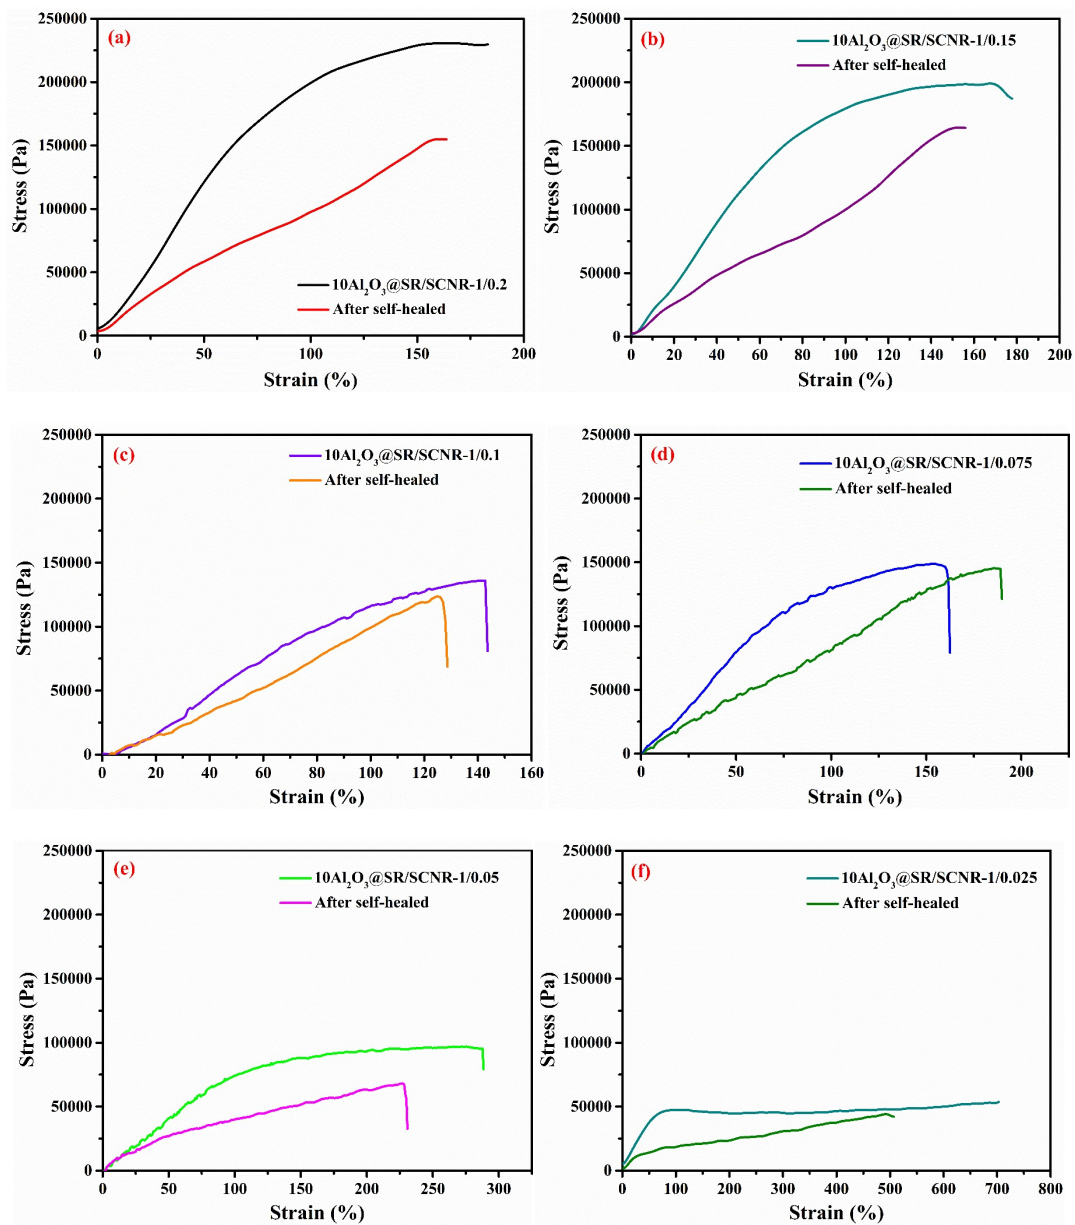



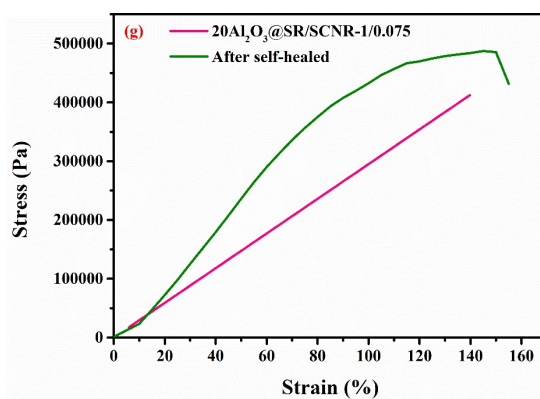

Fig. S5: (a-g) Self-healing properties of the  $\text{Al}_2\text{O}_3@SR$  and  $\text{Al}_2\text{O}_3@SR/SCNR$  composites with different SCNR wt% content

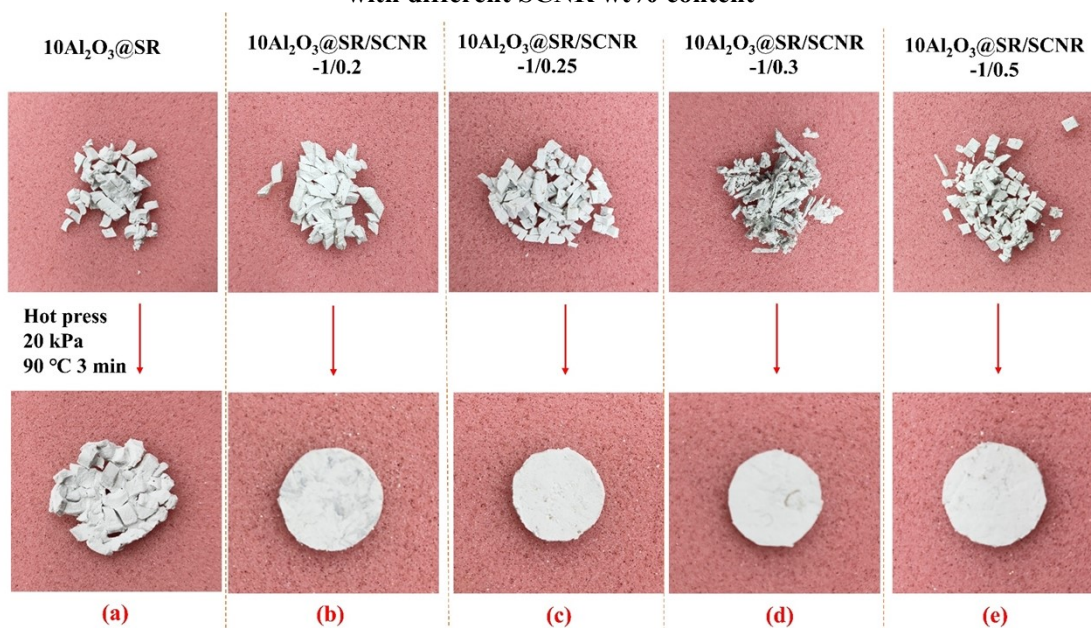

Fig. S6: Self-healing properties of the  $\text{Al}_2\text{O}_3@SR$  and  $\text{Al}_2\text{O}_3@SR/SCNR$  composites under 2 kPa pressure at 90 °C for 3 min

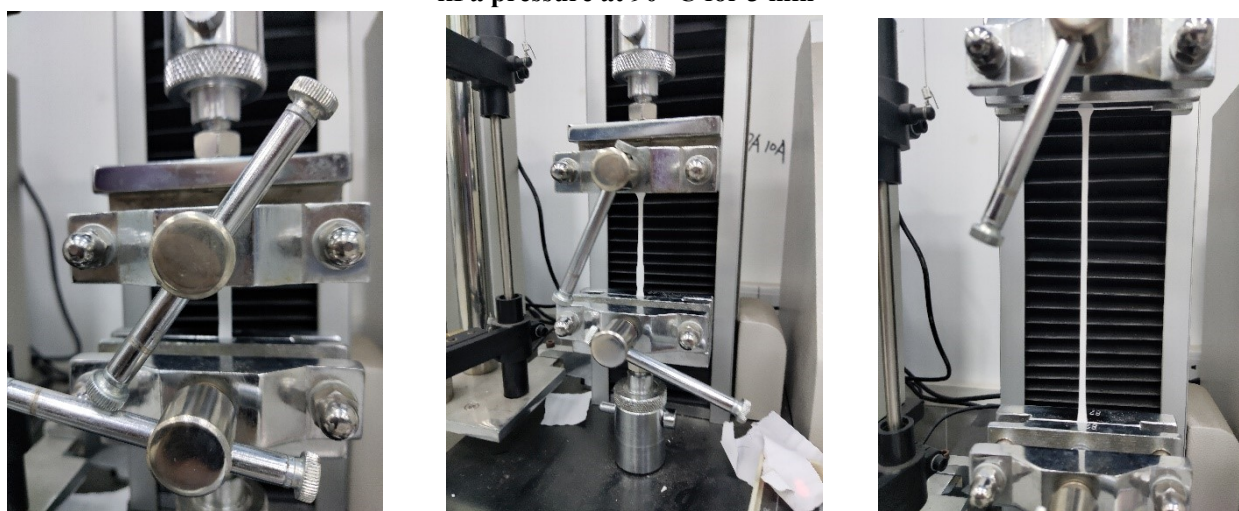

Fig. S7:  $\text{Al}_2\text{O}_3@SR/SCNR$  composites during tensile test

Table S2 A numerical contrast of the thermal conductivity, self-healing efficiency and

the time on self-healing of Al<sub>2</sub>O<sub>3</sub>@SR/SCNR composites with recent works

| Composites                              | Thermal conductivity (W/mK) | Self-healing efficiency (%) | Self-healing time (h) | References and year |
|-----------------------------------------|-----------------------------|-----------------------------|-----------------------|---------------------|
| Al <sub>2</sub> O <sub>3</sub> @SR/SCNR | 5.8                         | 95.6 %                      | 0.05                  | This work           |
| silicone/BN                             | 0.8837                      | 97.16                       | 0.25                  | 2020[S1]            |
| EMPI@VACNTs                             | 10.83                       | 90.8                        | 80                    | 2021[S2]            |
| Graphene/PDMS                           | 0.826                       | 78.83                       | 6                     | 2020[S3]            |
| mBN/thiol-epoxy                         | 1.058                       | 85                          | 1                     | 2018[S4]            |
| PDMS-COOH-CG                            | 0.48                        | 84.6                        | 24                    | 2021[S5]            |
| LCEF                                    | 1.25                        | 90.6                        | 1                     | 2021[S6]            |
| BN/GO/ENR/PLA                           | 0.36                        | 86                          | 1                     | 2022[S7]            |
| mBN-30/UPy-PDMS-UPy                     | 0.48                        | 84.6                        | 24                    | 2021[S8]            |

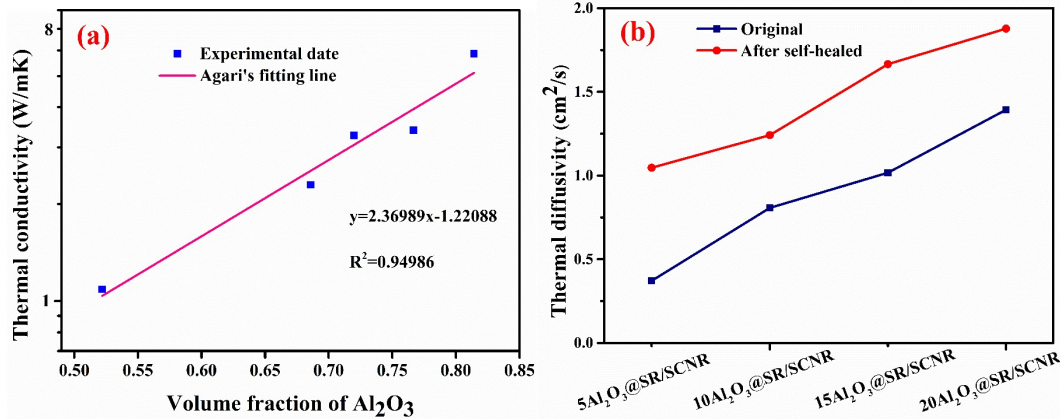

Fig. S8: (a) Experimental thermal conductivity data and the Agari's fitting line; (b) Thermal diffusivity of Al<sub>2</sub>O<sub>3</sub>@SR/SCNR before and after self-healed

The thermal conductivities of the composites with high filler content can be theoretically analyzed and predicted by classic **Agari's** model and the equation was as follows:

$$\log \lambda_c = V_f C_2 \log \lambda_f + (1 - V_f) \log(C_1 \lambda_p) \dots\dots\dots(1)$$

where  $\lambda_c$ ,  $\lambda_f$  and  $\lambda_p$  are the thermal conductivities of the composite, filler and polymer matrix, respectively. In this work, the thermal conductivities of silicone matrix and  $Al_2O_3$  are 0.2 W/mK and 27.5 W/mK, respectively.  $V_f$  is the volume fraction of the filler. The equation (1) can be transformed into equation (2):

$$\log \lambda_c = V_f [C_2 \log \lambda_f - \log(C_1 \lambda_p)] + \log(C_1 \lambda_p) \dots\dots\dots (2)$$

It can be seen from equation (2) that  $\lambda_c$  is a function of the  $V_f$ , and the relationship between  $\lambda_c$  and  $V_f$  was shown in. So an equation (3) for Agari's fitting line can be obtained as follows:

$$y = 2.4388x - 0.1.3287 \dots\dots\dots (3)$$

Therefore, from equations 2 and 3, the value of  $C_1$  can be calculated firstly ( $\log(C_1 \lambda_p) = -0.74$ ). The calculated  $C_1$  was 0.2345, and then  $C_2$  can be calculated to be 0.83.

## References:

- [S1] L. Zhao, X. Shi, Y. Yin, et al., A self-healing silicone/BN composite with efficient healing property and improved thermal conductivities, *Compos. Sci. Technol.* 186 (2020) 107919.
- [S2] H. Yu, Y. Feng, C. Chen, et al., Thermally conductive, self-healing, and elastic Polyimide@Vertically aligned carbon nanotubes composite as smart thermal interface material, *Carbon (New York)*. 179 (2021) 348-357.
- [S3] H. Yu, Y. Feng, L. Gao, et al., Self-Healing High Strength and Thermal Conductivity of 3D Graphene/PDMS Composites by the Optimization of Multiple Molecular Interactions, *Macromolecules*. 53 (16) (2020) 7161-7170.
- [S4] X. Yang, Y. Guo, X. Luo, et al., Self-healing, recoverable epoxy elastomers and their composites with desirable thermal conductivities by incorporating BN fillers via in-situ polymerization, *Compos. Sci. Technol.* 164 (2018) 59-64.
- [S5] D. Yue, H. Wang, H. Tao, et al., A Fast and Room-temperature Self-healing Thermal Conductive Polymer Composite, *Chinese J. Polym. Sci.* 39 (10) (2021) 1328-1336.
- [S6] X. Yang, X. Zhong, J. Zhang, et al., Intrinsic high thermal conductive liquid crystal epoxy film simultaneously combining with excellent intrinsic self-healing performance, *J. Mater. Sci. Technol.* 68 (2021) 209-215.
- [S7] C. Jia, P. Zhang, S.M. Seraji, et al., Effects of BN/GO on the recyclable, healable and thermal conductivity properties of ENR/PLA thermoplastic vulcanizates, *Composites. Part A, Applied science and manufacturing*. 152 (2022) 106686.
- [S8] C. Chen, H. Yu, Y. Feng, et al., Polymer composite material with both thermal conduction and self-healing functions, *ACTA POLYMERICA SINICA*. 52 (3) (2021) 272-280.
